# Supplementary material for: Dicarboxylate ligand-modulated assembly of new luminescent zinc(ii) coordination polymers with in situ formed tetrazole ligands: an experimental and theoretical study
Source: Royal Society of Chemistry journal article supplement (doi:10.1039/c5ra20443g), 2015-12-18
Supplement: c5ra20443g1.pdf [file c5ra20443g1.pdf]

## **Supplementary Information for:**

# **Dicarboxylate ligands-modulated assembly of new luminescent zinc(II) coordination polymers with *in situ* formed tetrazole ligand: An experimental and theoretical study**

**Rong-Yi Huang\*, Hao Jiang, Chang-Hai Zhu, Heng Xu\***

*Anhui Provincial Laboratory of Optoelectronic and Magnetism Functional Materials,  
School of Chemistry and Chemical Engineering, Anqing Normal University, Anqing  
246011, P. R. China*

### **Corresponding Author:**

Rong-Yi Huang, Heng Xu

Mailing Address: School of Chemistry and Chemical Engineering, Anqing Normal  
University, Anqing 246011, P. R. China

Telephone: +86-556-5500090

Fax: +86-556-5500090

E-mail: [huangry@aqtc.edu.cn](mailto:huangry@aqtc.edu.cn)

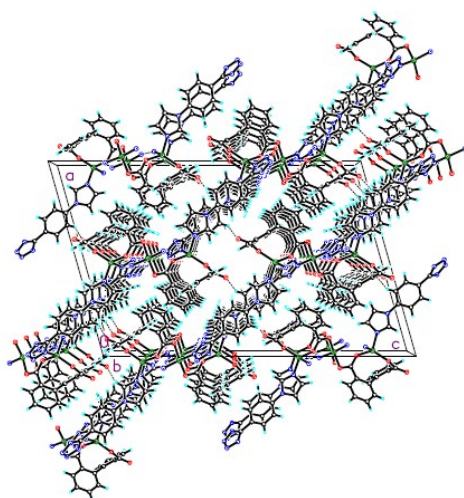

**Fig. S1** The crystal packing diagram of complex **1**

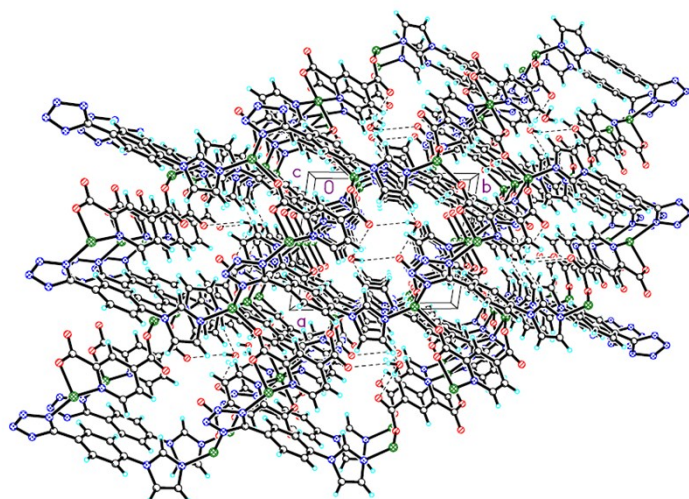

**Fig. S2** The crystal packing diagram of complex 2

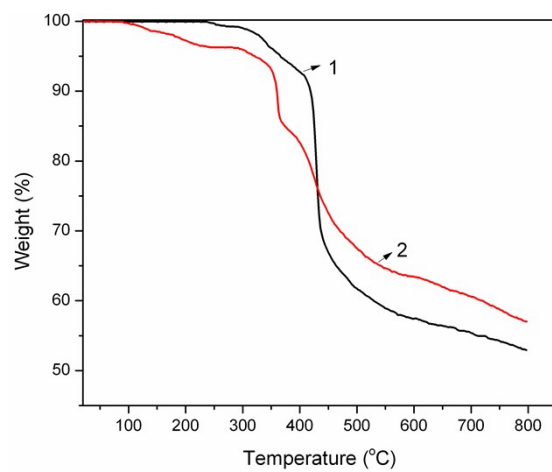

**Fig. S3** TG curves for complexes **1** and **2**
